# Supplementary material for: Gut microbiota variation of a tropical oil-collecting bee species far exceeds that of the honeybee
Source: PubMed Central journal article supplement (PMC10229882; doi:10.3389/fmicb.2023.1122489), 2023-05-17

## Catalog of pollen from common plant species found on Puerto Rico's coasts

**Note 1:** Each pollen type listed below has a 'Plant ID' that corresponds to the ID given to the pollen slide created for each plant species collected on the coast of Humacao, and a description of its morphology based on visible characteristics of the pollen grain. The collection of pollen slides is located in the laboratory of the Museum of Zoology at the UPR-RP. Pollen grains were observed using light microscopy at 400X and pictures were taken using an EP50 camera. Lastly, descriptions were assigned using the *Pollen Illustrated Terminology* by Halbritter et al. (2018).

**Note 2:** Images of the plant pollen slides and of the bee samples are available upon request.

### 1. Plant ID: P1

*Coccoloba uvifera*

#### Description:

- a. **Pollen unit:** Monad
- b. **Size:** Small
- c. **Polarity:** Isopolar
- d. **Shape:** Spheroidal
- e. **Aperture type:**
- f. **Aperture condition:** Tricolporate
- g. **Ornamentation:** Verrucate

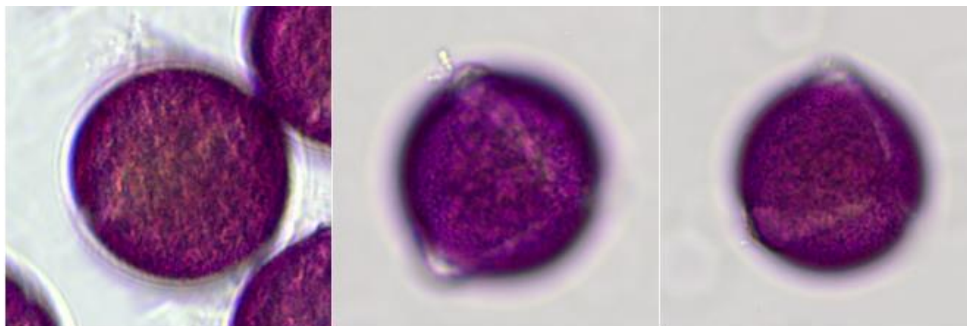

## 2. Plant ID: P2

*Phyla nodiflora*

### Description:

- a. **Pollen unit:** Monad
- b. **Size:** Small
- c. **Polarity:** Isopolar
- d. **Shape:** Spheroidal
- e. **Aperture type:**
- f. **Aperture condition:** Tricolporate, coporate
- g. **Ornamentation:** NA

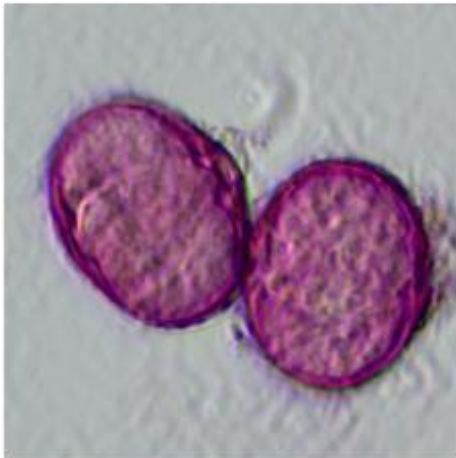

### 3. Plant ID: P3

*Sphagneticola trilobata*

#### Description:

- a. **Pollen unit:** Monad
- b. **Size:** Large
- c. **Polarity:** Isopolar
- d. **Shape:** Spheroidal
- e. **Aperture type:** Colporus
- f. **Aperture condition:** Colporate
- g. **Ornamentation:** Echinate

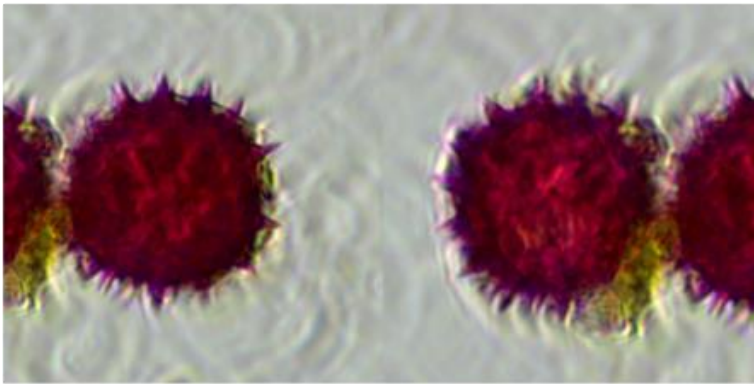

#### 4. Plant ID: P4

*Ipomoea pes-caprae* (Pink/Violet)

#### Description:

- a. **Pollen unit:** Monad
- b. **Size:** Large
- c. **Polarity:** Isopolar
- d. **Shape:** Spheroidal
- e. **Aperture type:** Colporus
- f. **Aperture condition:** Colporate
- g. **Ornamentation:** Echinate

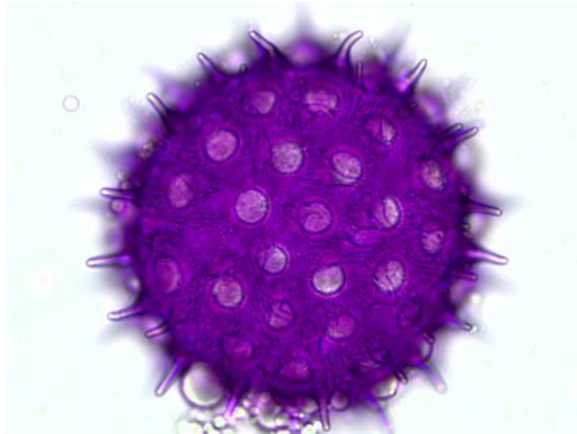

**5. Plant ID: P6**

*Canavalia rosea*

**Description:**

- a. Pollen unit:** Monad
- b. Size:** Small
- c. Polarity:** Isopolar
- d. Shape:** Triangular
- e. Aperture type:**
- f. Aperture condition:** Tricolporate, coporate
- g. Ornamentation:** NA

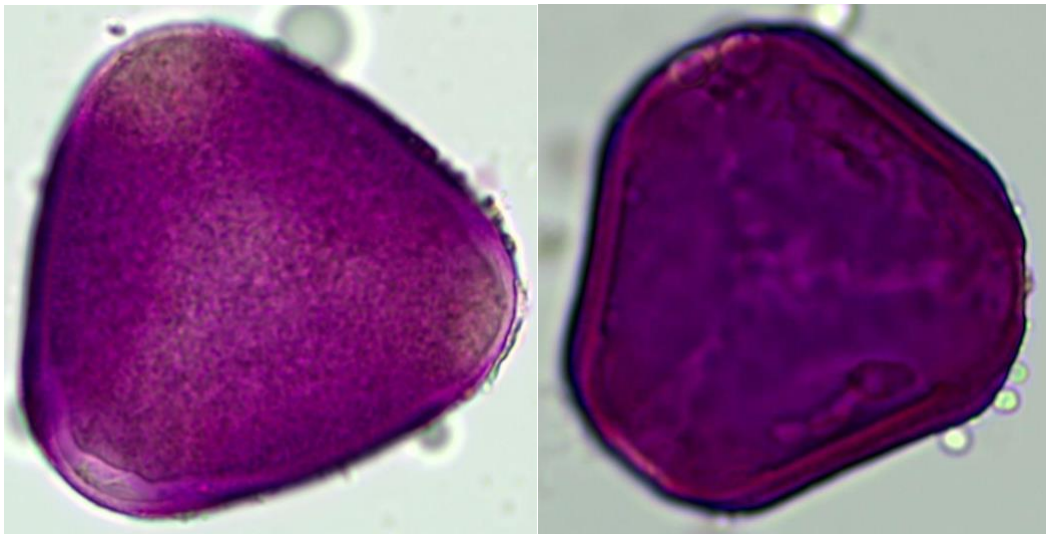

**6. Plant ID: P7**

*Ipomea imperati*

**Description:**

- a. Pollen unit:** Monad
- b. Size:** Large
- c. Polarity:** Isopolar
- d. Shape:** Spheroidal
- e. Aperture type:** Colporus
- f. Aperture condition:** Colporate
- g. Ornamentation:** Echinate

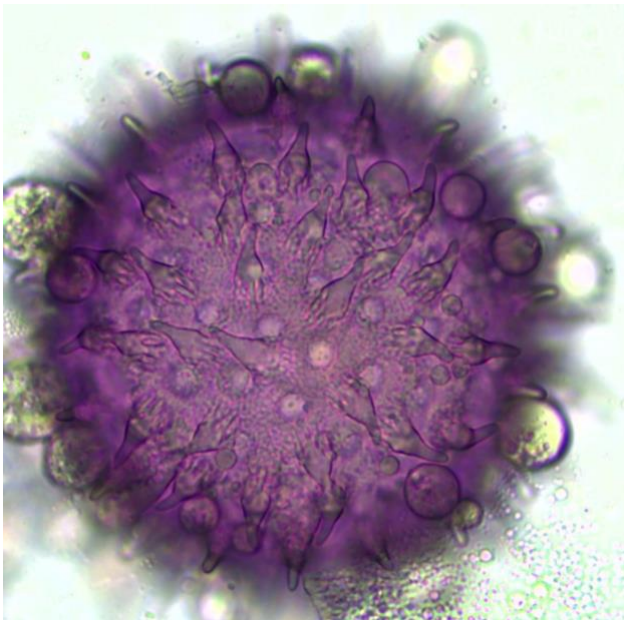

Supplement: Presentation_1.pdf [file Presentation_1.pdf]
