# Supplementary material for: Gut microbiota variation of a tropical oil-collecting bee species far exceeds that of the honeybee
Source: PubMed Central journal article supplement (PMC10229882; doi:10.3389/fmicb.2023.1122489), 2023-05-17
Supplement: Image_1.pdf [file Image_1.pdf]

**A**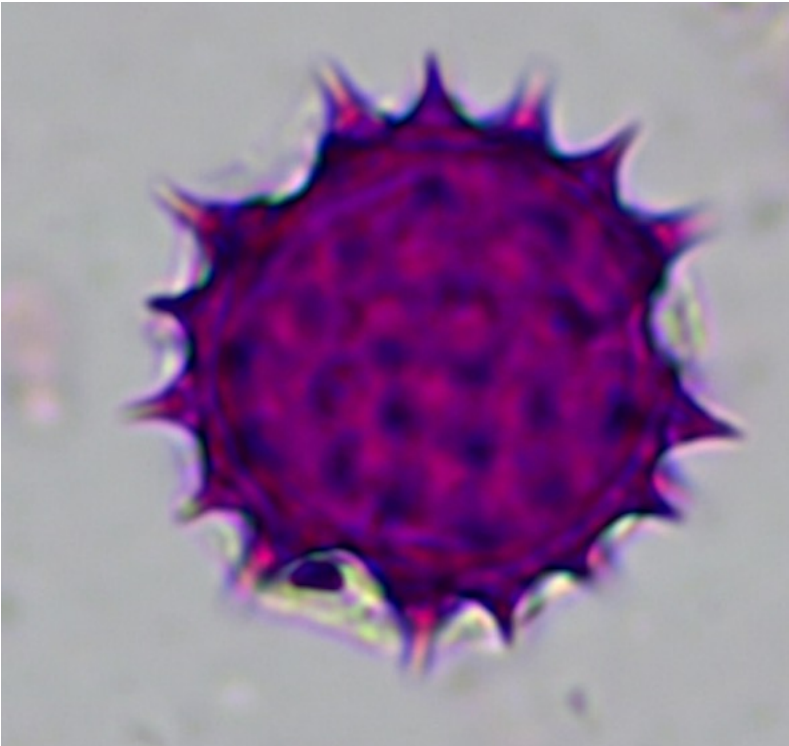**B**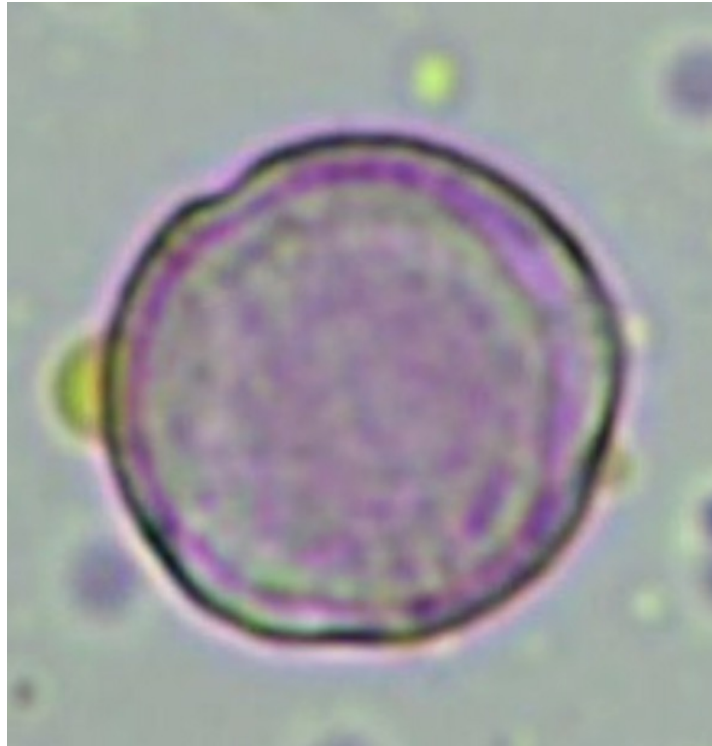**C**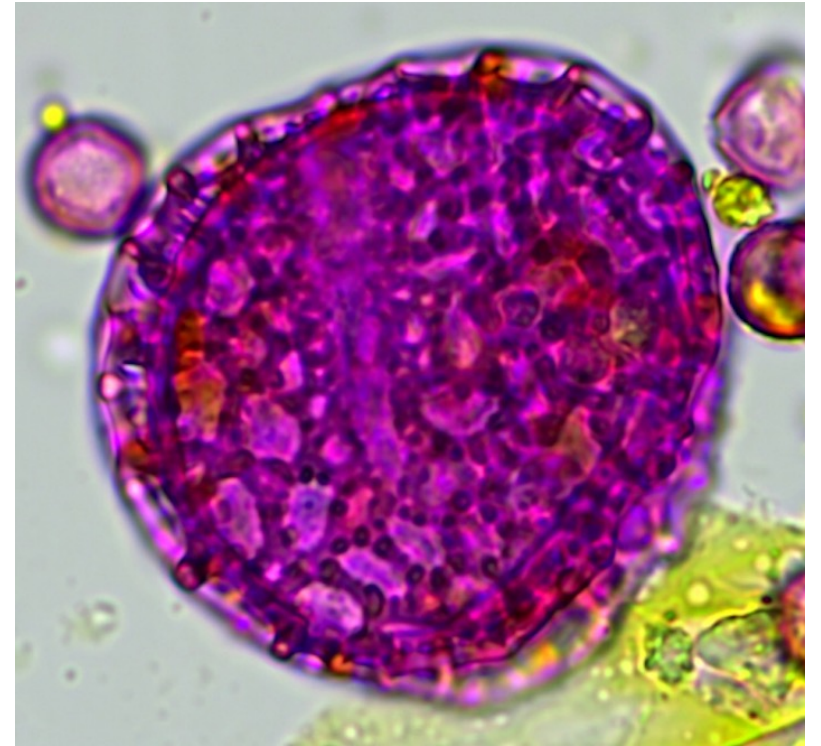

**Supplementary Figure 1. Examples of pollen grain pictures** of three plant families commonly observed (400x) in samples of *A. mellifera* and *C. decolorata*. **(A)** Asteraceae, **(B)** Malpighiaceae, and **(C)** a large *Passiflora* pollen grain surrounded by pollen grains of *Byrsonima sp.*
