# Supplementary material for: Gut microbiota variation of a tropical oil-collecting bee species far exceeds that of the honeybee
Source: PubMed Central journal article supplement (PMC10229882; doi:10.3389/fmicb.2023.1122489), 2023-05-17
Supplement: Image_2.pdf [file Image_2.pdf]

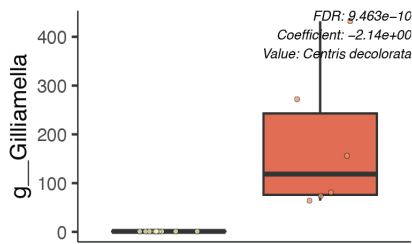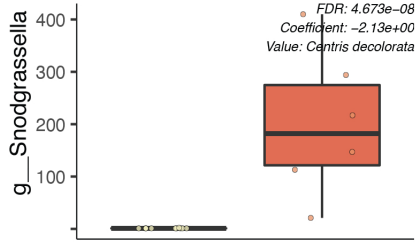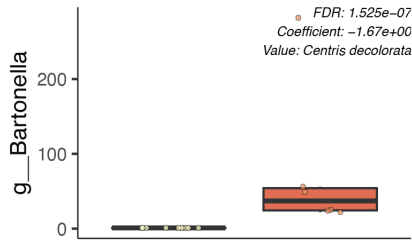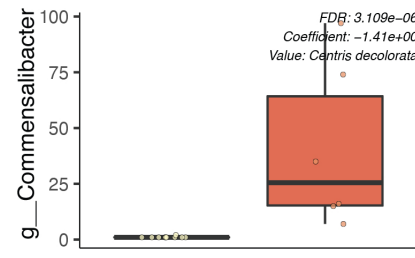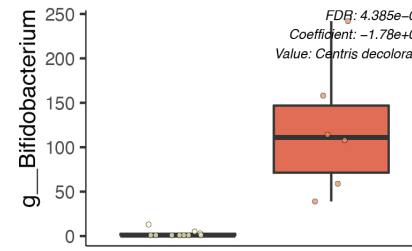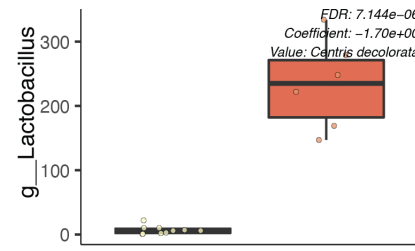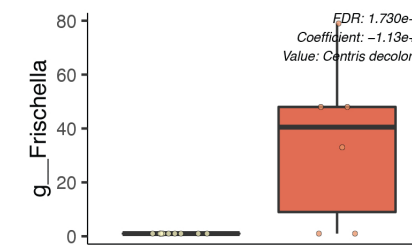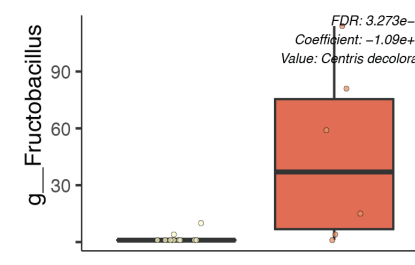

● *Apis mellifera* ● *Centris decolorata*

**Supplementary Figure 2.** Boxplots of bacterial genus-level (assigned per genus) that discriminate among the two bee species with a q-value cut-off =0.05, the corrected p-value for each taxon is shown in the upper right of the boxplots using MaAsLin.
