# Supplementary material for: Gut microbiota variation of a tropical oil-collecting bee species far exceeds that of the honeybee
Source: PubMed Central journal article supplement (PMC10229882; doi:10.3389/fmicb.2023.1122489), 2023-05-17
Supplement: Image_3.pdf [file Image_3.pdf]

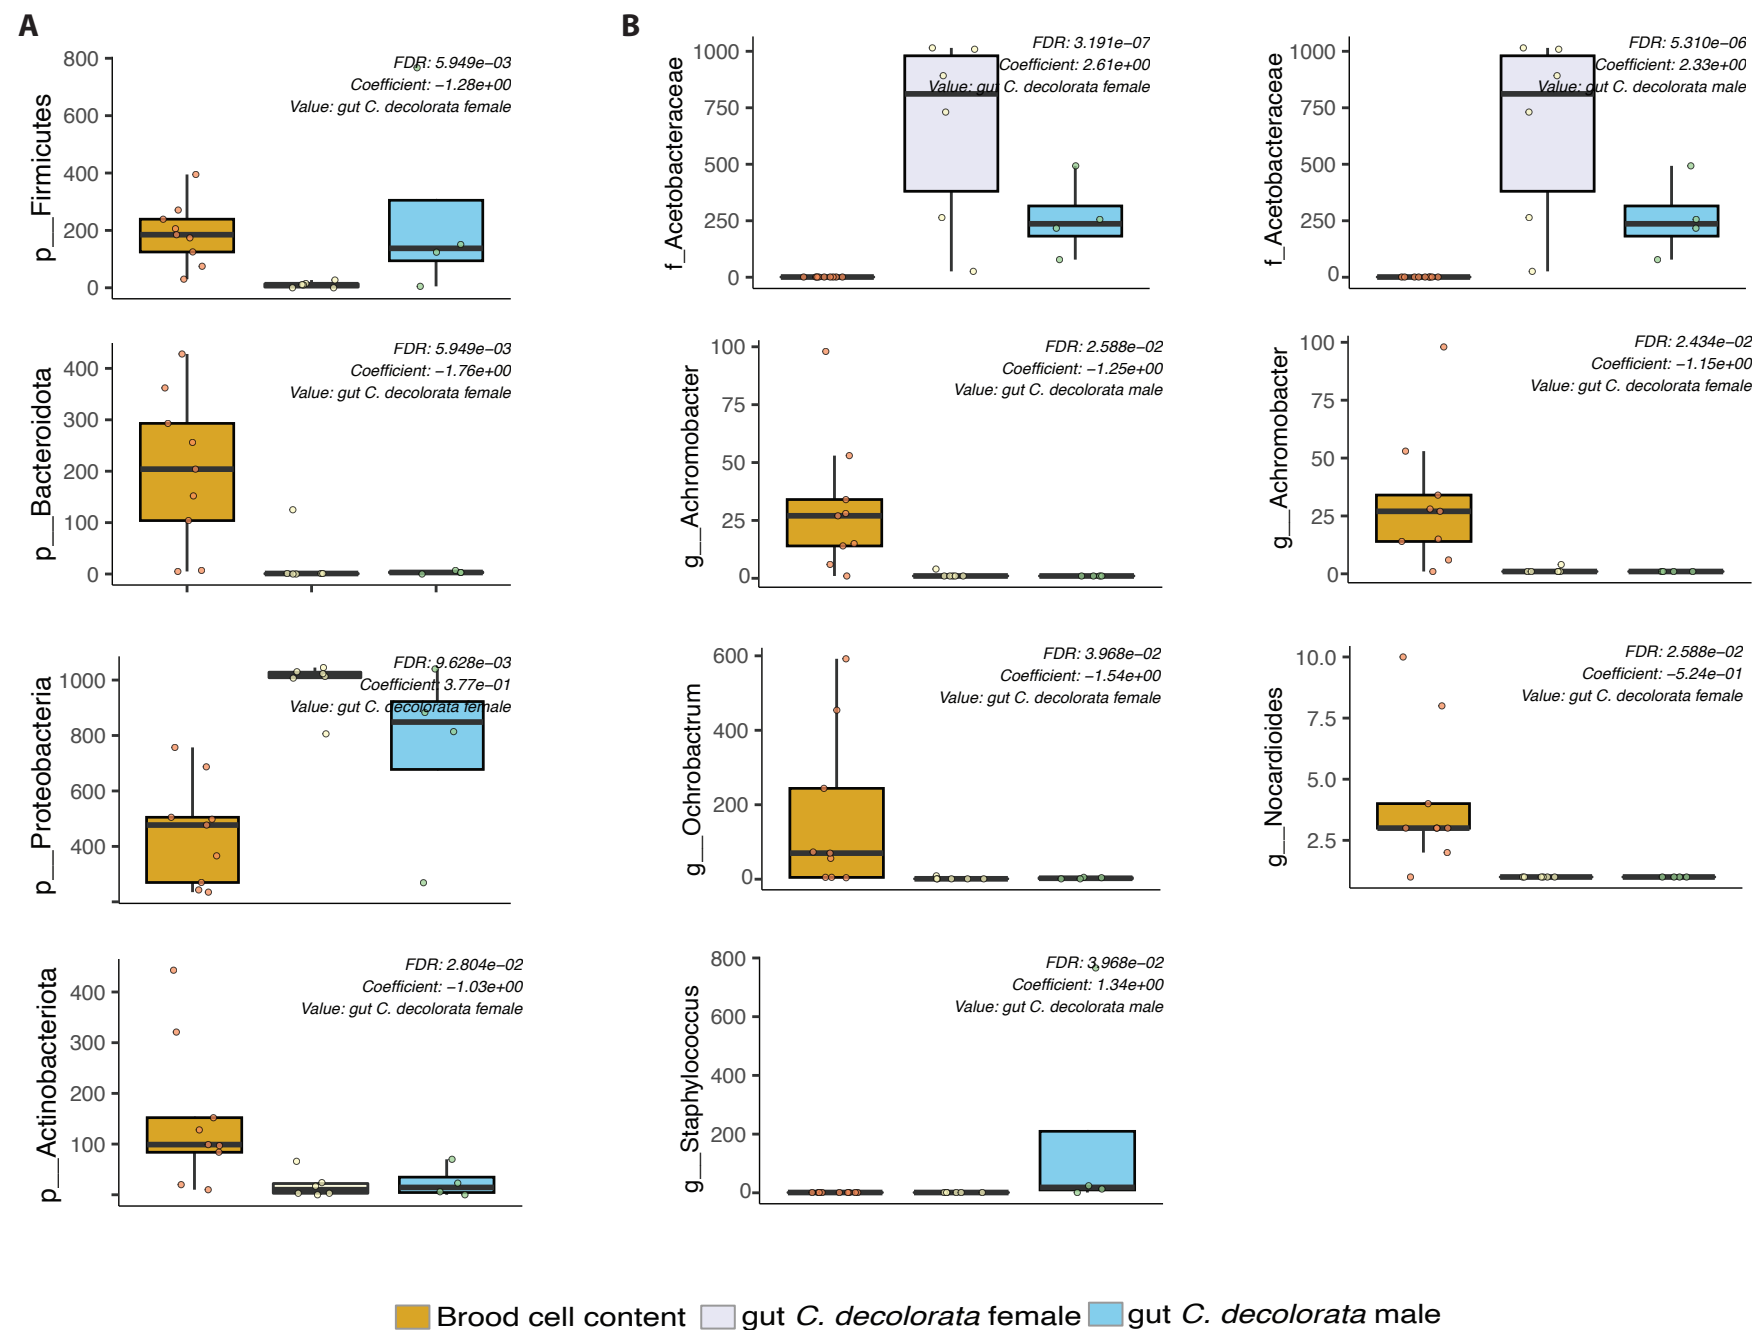

**Supplementary Figure 3.** Boxplots of bacterial phylum-level (assigned per phylum) (A) and genus-level (assigned per genus) (B) that discriminate among the *C. decolorata* samples with a q-value cut-off = 0.05, the corrected p-value for each taxon is shown in the upper right of the boxplots using MaAsLin.
