# Supplementary material for: Gut microbiota variation of a tropical oil-collecting bee species far exceeds that of the honeybee
Source: PubMed Central journal article supplement (PMC10229882; doi:10.3389/fmicb.2023.1122489), 2023-05-17
Supplement: Image_4.pdf [file Image_4.pdf]

**A**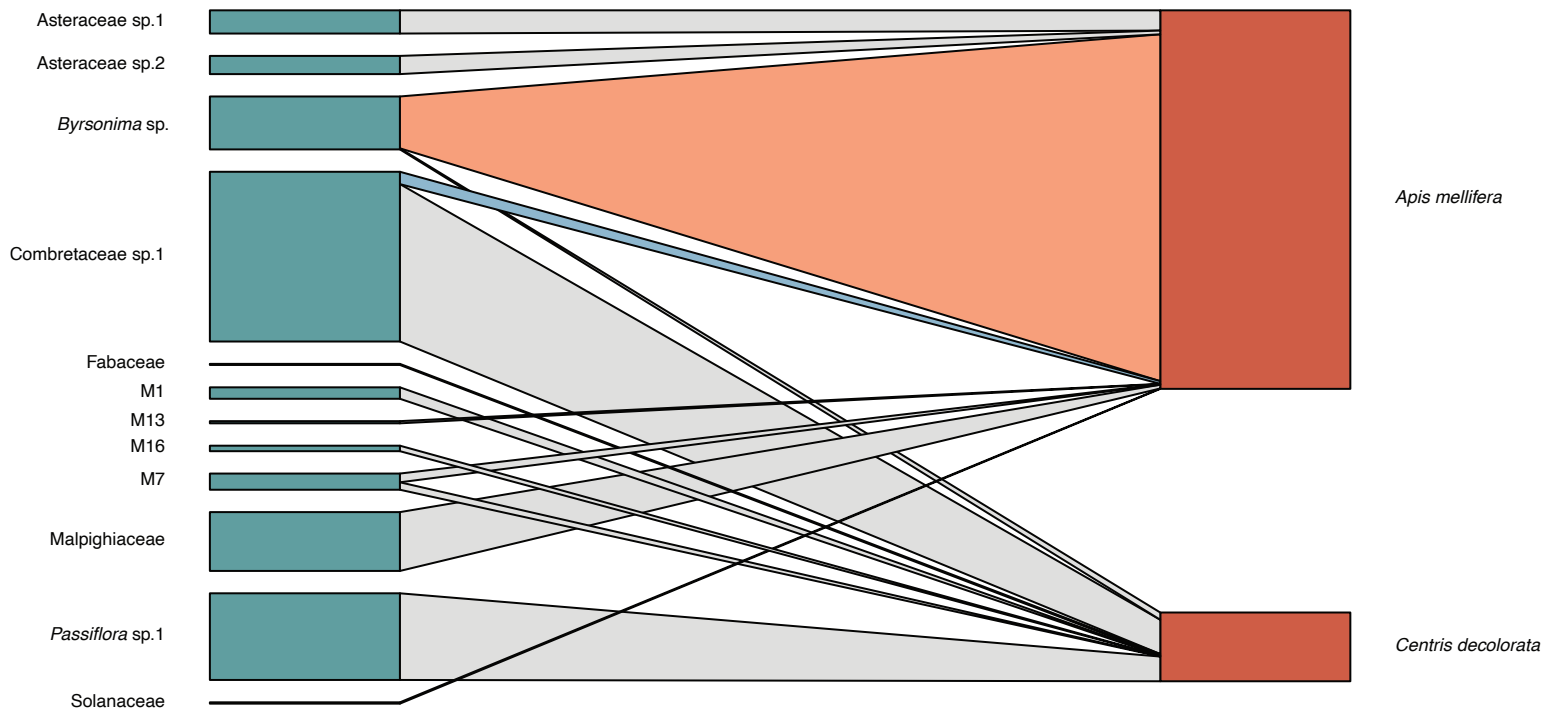**B***Apis mellifera*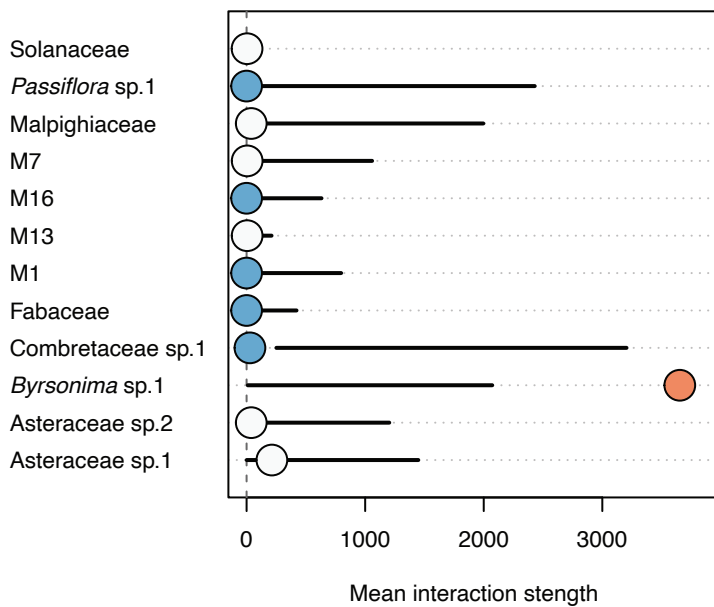**C***Centris decolorata*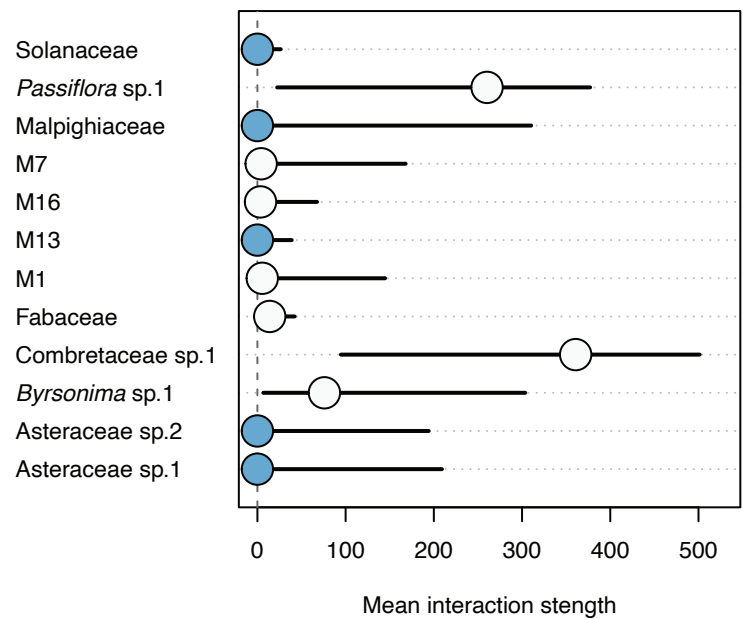

**Supplementary Figure 4.** (A) Pollination network of *Apis mellifera* and *Centris decolorata*. The labels containing the letter ‘M’ represent pollen types that were classified by their morphological characteristics. Based on the number of pollen grains and their volume, *A. mellifera* and *C. decolorata* did not present significant differences in plant species richness and diversity (Kruskal-Wallis test  $p = 0.20$  and  $p = 0.28$ , respectively). The interaction width is influenced by pollen type abundance corrected by their volume for all samples. Interactions are color-coded according to whether they are consistent with the null model (grey), stronger (red), or weaker (blue) than expected. Both *A. mellifera* and *C. decolorata* had a weaker interaction with Combretaceae sp.1 compared to the null model. *A. mellifera* presented a stronger interaction with *Byrsonima* sp.1, while *C. decolorata* had a stronger interaction with *Passiflora* sp.1 than expected. Dot charts present observed and expected interaction strengths for (B) *A. mellifera*, (C) *C. decolorata*, and their plant resources.
