# Supplementary material for: Gut microbiota variation of a tropical oil-collecting bee species far exceeds that of the honeybee
Source: PubMed Central journal article supplement (PMC10229882; doi:10.3389/fmicb.2023.1122489), 2023-05-17
Supplement: Table_1.pdf [file Table_1.pdf]

| Group 1                                                                                                 | Group 2                             | H        | p-value         | q-value         |
|---------------------------------------------------------------------------------------------------------|-------------------------------------|----------|-----------------|-----------------|
| <b>Comparison group 1: <i>Apis mellifera</i> vs. <i>Centris decolorata</i> (adults)</b>                 |                                     |          |                 |                 |
| <b>Chao1</b>                                                                                            |                                     |          |                 |                 |
| <i>Apis mellifera</i> (n=6)                                                                             | <i>Centris decolorata</i> (n=10)    | 0.011765 | 0.913627        | 0.913627        |
| <b>Shannon</b>                                                                                          |                                     |          |                 |                 |
| <i>Apis mellifera</i> (n=6)                                                                             | <i>Centris decolorata</i> (n=10)    | 7.952941 | <b>0.004801</b> | 0.004801        |
| <b>Comparison group 2 : <i>Centris decolorata</i> females, males, larvae, and brood cell provisions</b> |                                     |          |                 |                 |
| <b>Chao1</b>                                                                                            |                                     |          |                 |                 |
| gut <i>C. decolorata</i> female (n=6)                                                                   | larva (n=2)                         | 1.000000 | 0.317311        | 0.425447        |
|                                                                                                         | gut <i>C. decolorata</i> male (n=4) | 0.045455 | 0.831170        | 0.831170        |
|                                                                                                         | brood cell provision (n=7)          | 5.897959 | <b>0.015158</b> | <u>0.090951</u> |
| larva (n=2)                                                                                             | gut <i>C. decolorata</i> male (n=4) | 0.857143 | 0.354539        | 0.425447        |
|                                                                                                         | brood cell provision (n=7)          | 2.142857 | 0.143235        | 0.286470        |
| gut <i>C. decolorata</i> male (n=4)                                                                     | brood cell provision (n=7)          | 4.321429 | <b>0.037635</b> | <u>0.112906</u> |
| <b>Shannon</b>                                                                                          |                                     |          |                 |                 |
| gut <i>C. decolorata</i> female (n=6)                                                                   | larva (n=2)                         | 2.777778 | 0.095581        | 0.143371        |
|                                                                                                         | gut <i>C. decolorata</i> male (n=4) | 1.136364 | 0.286422        | 0.343706        |
|                                                                                                         | brood cell provision (n=7)          | 9.000000 | <b>0.002700</b> | 0.016199        |
| larva (n=2)                                                                                             | gut <i>C. decolorata</i> male (n=4) | 0.214286 | 0.643429        | 0.643429        |
|                                                                                                         | brood cell provision (n=7)          | 4.200000 | <b>0.040424</b> | <u>0.080848</u> |
| gut <i>C. decolorata</i> male (n=4)                                                                     | brood cell provision (n=7)          | 7.000000 | <b>0.008151</b> | 0.024453        |

**Supplementary Table 1. Results of alpha diversity differences analyses using Chao1 and Shannon indices.** In bold are shown the significant results. The alpha diversity of comparison group 1 (*Apis mellifera* vs. *Centris decolorata*) shows significant differences in diversity using Shannon (p-value=0.004801) but no difference in richness using Chao1 (p-value=0.913627). Concerning comparison group 2 (*Centris decolorata* categories), brood cell provision microbiota shows significant differences both in diversity using Shannon (p-value=0.0027) and richness using Chao1 (p-value=0.008151) with other groups (gut of *C. decolorata* female and male). In addition, the brood cell provision microbiota also shows significant differences in terms of diversity using Shannon index with larva (p-value=0.040424). However, the q-values (adjusted p-values) that account for the percentage of false positive should rather be considered in the case of the larvae group, given its low sample size. All the q-value contradicting the p-value are underlined.

Attention of the reader is drawn to all the groups with samples size  $n < 5$  (sample size  $\geq 5$  being an assumption of Kruskal-Wallis test). For those samples, the H statistic is less well approximated to the chi-square distribution. Therefore, the null hypothesis (rejected when H is larger than the critical cutoff point in chi-square distribution) cannot be accurately tested. These results should thus be confirmed with greater sampling size.
