# Supplementary material for: Gut microbiota variation of a tropical oil-collecting bee species far exceeds that of the honeybee
Source: PubMed Central journal article supplement (PMC10229882; doi:10.3389/fmicb.2023.1122489), 2023-05-17
Supplement: Table_2.pdf [file Table_2.pdf]

| Comparison group 1: <i>Apis mellifera</i> vs. <i>Centris decolorata</i> (adults) |              | Comparison group 2: <i>Centris decolorata</i> females, males, larvae, and brood cell provisions |              |
|----------------------------------------------------------------------------------|--------------|-------------------------------------------------------------------------------------------------|--------------|
| <b>PERMANOVA results</b>                                                         |              | <b>PERMANOVA results</b>                                                                        |              |
| method name                                                                      | PERMANOVA    | method name                                                                                     | PERMANOVA    |
| test statistic name                                                              | pseudo-F     | test statistic name                                                                             | pseudo-F     |
| sample size                                                                      | 16           | sample size                                                                                     | 19           |
| number of groups                                                                 | 2            | number of groups                                                                                | 4            |
| test statistic                                                                   | 8.971008     | test statistic                                                                                  | 3.832448     |
| p-value                                                                          | <b>0.001</b> | p-value                                                                                         | <b>0.001</b> |
| number of permutations                                                           | 999          | number of permutations                                                                          | 999          |
| <b>PERMDISP results</b>                                                          |              | <b>PERMDISP results</b>                                                                         |              |
| method name                                                                      | PERMDISP     | method name                                                                                     | PERMDISP     |
| test statistic name                                                              | F-value      | test statistic name                                                                             | F-value      |
| sample size                                                                      | 16           | sample size                                                                                     | 19           |
| number of groups                                                                 | 2            | number of groups                                                                                | 4            |
| test statistic                                                                   | 1.140257     | test statistic                                                                                  | 1.664951     |
| p-value                                                                          | 0.112        | p-value                                                                                         | 0.190        |
| number of permutations                                                           | 999          | number of permutations                                                                          | 999          |
| <b>ANOSIM results</b>                                                            |              | <b>ANOSIM results</b>                                                                           |              |
| method name                                                                      | ANOSIM       | method name                                                                                     | ANOSIM       |
| test statistic name                                                              | R            | test statistic name                                                                             | R            |
| sample size                                                                      | 16           | sample size                                                                                     | 19           |
| number of groups                                                                 | 2            | number of groups                                                                                | 4            |
| test statistic                                                                   | 0.964167     | test statistic                                                                                  | 0.720022     |
| p-value                                                                          | <b>0.001</b> | p-value                                                                                         | <b>0.001</b> |
| number of permutations                                                           | 999          | number of permutations                                                                          | 999          |

**Supplementary Table 2. Results of beta diversity differences analyses using Permanova, Permdisp, and Anosim.** In bold are shown the significant results. The beta diversity of comparison group 1 (*Apis mellifera* vs. *Centris decolorata*), as well as that of comparison group 2 (*Centris decolorata* categories) show significant differences using Permanova (both p-value=0.001), but Permdisp test shows that the observed differences in beta diversity could be explained by the difference in dispersion of Bray-Curtis distances (p-value=0.112 and p-value=0.190, respectively). Anosim however confirms significant differences in beta diversity between adults of both species, and between *Centris decolorata* categories (both p-value=0.001).
